# Supplementary material
Source: HighWire-hosted journal article supplement (https://www.cmajopen.ca/highwire/filestream/81334/field_highwire_adjunct_files/2/2019-0037-COREQ-checklist.pdf)
Supplement: 2019-0037-COREQ-checklist.pdf [file 2019-0037-COREQ-checklist.pdf]

**Manuscript: Gaps in public preparedness to be a substitute decision maker and the acceptability of high school education on resuscitation and end-of-life care: a mixed-methods study**

Developed from: Tong A, Sainsbury P, Craig J. Consolidated criteria for reporting qualitative research (COREQ): a 32-item checklist for interviews and focus groups. *International Journal for Quality in Health Care*. 2007. Volume 19, Number 6: pp. 349 –357

**Consolidated criteria for reporting qualitative studies (COREQ): 32-item checklist**

| No. Item                                       | Guide questions/description                                                                              | Reported on Page #                                                                                                                                                                                                                                                                                        |
|------------------------------------------------|----------------------------------------------------------------------------------------------------------|-----------------------------------------------------------------------------------------------------------------------------------------------------------------------------------------------------------------------------------------------------------------------------------------------------------|
| <b>Domain 1: Research team and reflexivity</b> |                                                                                                          |                                                                                                                                                                                                                                                                                                           |
| <i>Personal Characteristics</i>                |                                                                                                          |                                                                                                                                                                                                                                                                                                           |
| 1. Interviewer/facilitator                     | Which author/s conducted the interview or focus group?                                                   | MKYW, MCM and KYL (see “ <b>Contributors</b> ” at the end of the manuscript)                                                                                                                                                                                                                              |
| 2. Credentials                                 | What were the researcher’s credentials? E.g. PhD, MD                                                     | See author credentials on cover page (page 1)                                                                                                                                                                                                                                                             |
| 3. Occupation                                  | What was their occupation at the time of the study?                                                      | Present in the manuscript under “ <b>Study Design and Development</b> , paragraph 1” and “ <b>Contributors</b> ”<br><br>Group of staff and resident physicians in emergency or family medicine, with representation of medical education and palliative care subspecialization, and two medical students. |
| 4. Gender                                      | Was the researcher male or female?                                                                       | See “ <b>Contributors</b> ,” for the gender of the interviewers                                                                                                                                                                                                                                           |
| 5. Experience and training                     | What experience or training did the researcher have?                                                     | Standardized script and approach (see “ <b>Participants and sampling</b> ” <b>Appendix A</b> )                                                                                                                                                                                                            |
| <i>Relationship with participants</i>          |                                                                                                          |                                                                                                                                                                                                                                                                                                           |
| 6. Relationship established                    | Was a relationship established prior to study commencement?                                              | No – this was a street intercept (reported in <b>Abstract &amp; “Participants and Sampling”</b> )                                                                                                                                                                                                         |
| 7. Participant knowledge of the interviewer    | What did the participants know about the researcher? e.g. personal goals, reasons for doing the research | <b>Data Collection and Procedures</b><br><br>Participants were aware that we were a resident physician and medical                                                                                                                                                                                        |

|                                |                                                                                                                                           |                                                                                                                                                                                                  |
|--------------------------------|-------------------------------------------------------------------------------------------------------------------------------------------|--------------------------------------------------------------------------------------------------------------------------------------------------------------------------------------------------|
|                                |                                                                                                                                           | students conducting research to explore enablers and barriers to being a SDM.                                                                                                                    |
| 8. Interviewer characteristics | What characteristics were reported about the interviewer/facilitator? e.g. Bias, assumptions, reasons and interests in the research topic | <b>Data Collection and Procedures</b><br><br>Participants were aware that we were a resident physician and medical students conducting research to explore enablers and barriers to being a SDM. |

|                                          |                                                                                                                                                          |                                                                                                                                                                                               |
|------------------------------------------|----------------------------------------------------------------------------------------------------------------------------------------------------------|-----------------------------------------------------------------------------------------------------------------------------------------------------------------------------------------------|
| <b>Domain 2: study design</b>            |                                                                                                                                                          |                                                                                                                                                                                               |
| <i>Theoretical framework</i>             |                                                                                                                                                          |                                                                                                                                                                                               |
| 9. Methodological orientation and Theory | What methodological orientation was stated to underpin the study? e.g. grounded theory, discourse analysis, ethnography, phenomenology, content analysis | Survey designed based on Health Belief Model (see “ <b>Study design and development,</b> ” paragraph 1)<br><br>Inductive thematic analysis (see “ <b>Qualitative Analysis,</b> ” paragraph 3) |
| <i>Participant selection</i>             |                                                                                                                                                          |                                                                                                                                                                                               |
| 10. Sampling                             | How were participants selected? e.g. purposive, convenience, consecutive, snowball                                                                       | Every 3 <sup>rd</sup> person present in the area and time of data collection (See “ <b>Participants and Sampling,</b> ” paragraph 1, and “ <b>Data Collection and Procedures</b> ”)           |
| 11. Method of approach                   | How were participants approached? e.g. face-to-face, telephone, mail, email                                                                              | Face-to-face as described in “ <b>Data Collection and Procedures,</b> ” paragraph 2                                                                                                           |
| 12. Sample size                          | How many participants were in the study?                                                                                                                 | 430 (see <b>Figure 1</b> , and <b>Abstract</b> )                                                                                                                                              |
| 13. Non-participation                    | How many people refused to participate or dropped out? Reasons?                                                                                          | See <b>Figure 1</b>                                                                                                                                                                           |
| <i>Setting</i>                           |                                                                                                                                                          |                                                                                                                                                                                               |
| 14. Setting of data collection           | Where was the data collected? e.g. home, clinic, workplace                                                                                               | 12 public locations, see Box 1                                                                                                                                                                |
| 15. Presence of non-participants         | Was anyone else present besides the participants and researchers?                                                                                        | <b>No</b>                                                                                                                                                                                     |

|                                        |                                                                                   |                                                                                                                                                                                        |
|----------------------------------------|-----------------------------------------------------------------------------------|----------------------------------------------------------------------------------------------------------------------------------------------------------------------------------------|
| 16. Description of sample              | What are the important characteristics of the sample? e.g. demographic data, date | See <b>Table 1</b> & “ <b>Data collection and procedures</b> ” & <b>Box 1</b>                                                                                                          |
| <i>Data collection</i>                 |                                                                                   |                                                                                                                                                                                        |
| 17. Interview guide                    | Were questions, prompts, guides provided by the authors? Was it pilot tested?     | Yes, pilot tested (see “ <b>Study Design,</b> ” <b>paragraph 2</b> ) and a standardized questionnaire with script for approach and prompts for questions                               |
| 18. Repeat interviews                  | Were repeat interviews carried out? If yes, how many?                             | No repeat interviews were done (implied)                                                                                                                                               |
| 19. Audio/visual recording             | Did the research use audio or visual recording to collect the data?               | No                                                                                                                                                                                     |
| 20. Field notes                        | Were field notes made during and/or after the interview or focus group?           | Yes, field notes were recorded during the interview (see “ <b>Data Collection and Procedures</b> ”)                                                                                    |
| 21. Duration                           | What was the duration of the inter views or focus group?                          | 10 minutes, see “ <b>Study Design and Development</b> ”                                                                                                                                |
| 22. Data saturation                    | Was data saturation discussed?                                                    | Sample size was driven by the quantitative methodology. All 430 interviews were coded and analyzed and as described in the <b>Results</b> , paragraph 5, data saturation was achieved. |
| 23. Transcripts returned               | Were transcripts returned to participants for comment and/or correction?          | Participants were given an opportunity to correct their answers & the field notes (see “ <b>Data Collection and Procedures</b> ”)                                                      |
| <b>Domain 3: analysis and findings</b> |                                                                                   |                                                                                                                                                                                        |
| <i>Data analysis</i>                   |                                                                                   |                                                                                                                                                                                        |
| 24. Number of data coders              | How many data coders coded the data?                                              | MKYW and WJC (see <b>Analysis</b> )                                                                                                                                                    |
| 25. Description of the coding tree     | Did authors provide a description of the coding tree?                             | See <b>Table 3 and 4</b> for themes and sub-themes, representative of coding tree                                                                                                      |
| 26. Derivation of themes               | Were themes identified in advance or derived from the data?                       | Inductively derived from data (see <b>Analysis</b> )                                                                                                                                   |
| 27. Software                           | What software, if applicable, was used to manage the data?                        | Manually done in Excel (no specific qualitative software was used)                                                                                                                     |
| 28. Participant checking               | Did participants provide feedback on the findings?                                | No                                                                                                                                                                                     |
| <i>Reporting</i>                       |                                                                                   |                                                                                                                                                                                        |

|                                  |                                                                                                                                 |                                    |
|----------------------------------|---------------------------------------------------------------------------------------------------------------------------------|------------------------------------|
| 29. Quotations presented         | Were participant quotations presented to illustrate the themes/findings? Was each quotation identified? e.g. participant number | Yes, <b>Table 3 and 4</b>          |
| 30. Data and findings consistent | Was there consistency between the data presented and the findings?                                                              | Yes                                |
| 31. Clarity of major themes      | Were major themes clearly presented in the findings?                                                                            | Yes, <b>Table 3 and 4</b>          |
| 32. Clarity of minor themes      | Is there a description of diverse cases or discussion of minor themes?                                                          | Yes, <b>Table 3 and 4, Results</b> |
